# Supplementary material for: Structural superlubricity at the interface of penta-BN2
Source: Royal Society of Chemistry journal article supplement (doi:10.1039/d4cp00619d), 2024-01-01
Supplement: d4cp00619d2.pdf [file d4cp00619d2.pdf]

SUPPLEMENTARY INFORMATION

**The structural superlubricity at the interface of penta-BN<sub>2</sub>**

Hao Wang,<sup>a</sup> Hanyue Zhang,<sup>b</sup> Xinqi Zhang,<sup>a</sup> Tengfei Cao,<sup>a</sup> Junqi Shi,<sup>a,\*</sup> Xiaoli Fan<sup>a,\*</sup>

<sup>a</sup> State Key Laboratory of Solidification Processing, Center for Advanced Lubrication and Seal Materials, School of Material Science and Engineering, Northwestern Polytechnical University, Xi'an, Shaanxi 710072, China

<sup>b</sup> Queen Mary University of London Engineering School, Northwestern Polytechnical University, 127 YouYi Western Road, Xi'an, Shaanxi 710072, China

\*Corresponding author: [xlfan@nwpu.edu.cn](mailto:xlfan@nwpu.edu.cn)

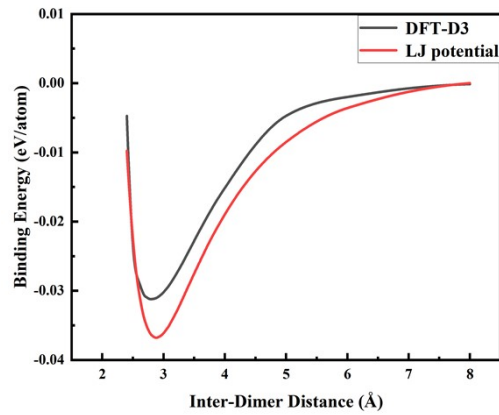

**Fig.S1** Binding energy of the bilayer penta-BN<sub>2</sub> calculated by the many-body dispersion effects corrected density functional theory (DFT-D3) method and Lennard-Jones (LJ) potential.

**Fig.S2** Diagram showing the sliding directions on the surface of penta-BN<sub>2</sub> monolayer.

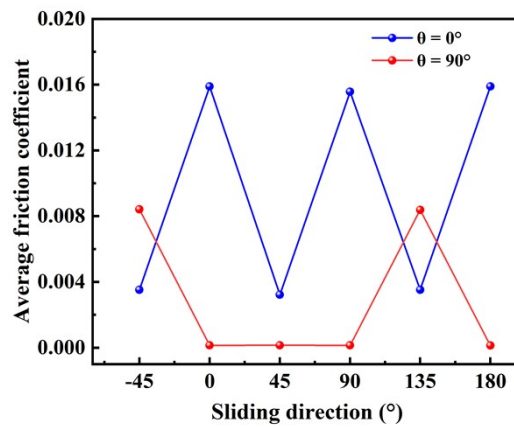

**Fig.S3** The averaged friction coefficients along -45°, 0°, 45°, 90°, 135° and 180° sliding direction at the interface of the bilayer penta-BN<sub>2</sub> with twist angles of 0° and 90°.

**Fig.S4** A snapshot for the sliding along the direction of 135° at the interface of bilayer penta-BN<sub>2</sub> with the twist angle of 90°.

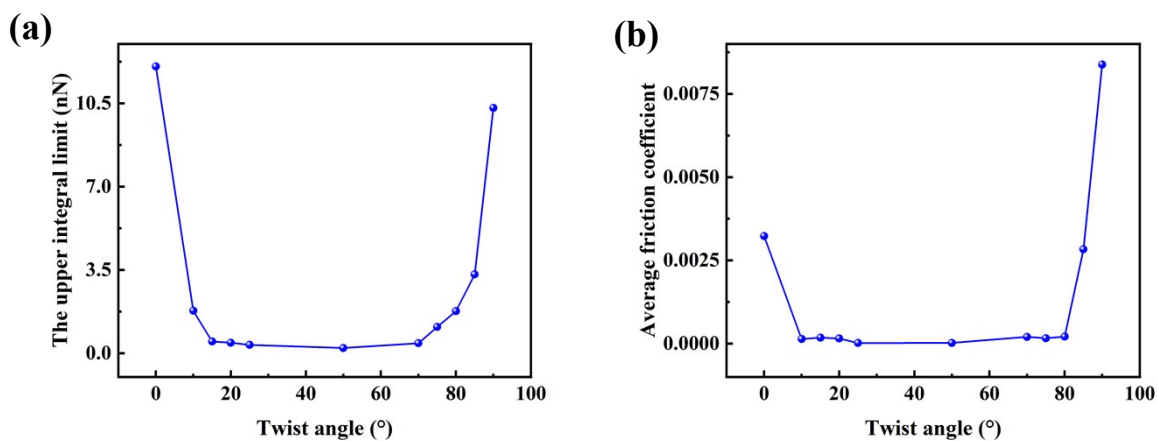

**Fig.S5** (a) The upper limit of the integral along 135° sliding direction at the interface of the relatively rotated bilayer penta-BN<sub>2</sub> with quasi-harmonic periodic oscillation. (b) The averaged friction coefficient along 135° sliding direction at the interface of the relatively rotated bilayer penta-BN<sub>2</sub> with quasi-harmonic periodic oscillation.

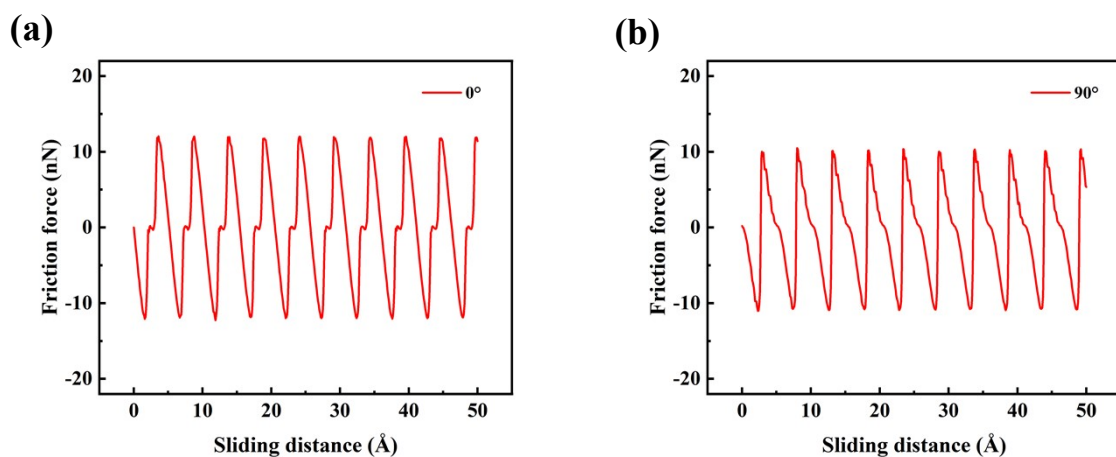

**Fig.S6** The friction force along 135° sliding direction at the interface of the relatively rotated bilayer penta-BN<sub>2</sub> with twist angles of (a) 0° and (b) 90°.

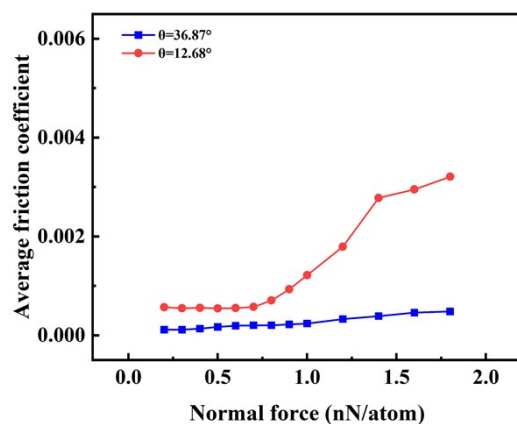

**Fig.S7** The evolution of the averaged friction coefficient at the interface of relatively rotated bilayer penta-BN<sub>2</sub> with twist angles of 36.87° and 12.68° with respect to the normal force of 0.2 ~ 1.8 nN/atom via adopting the larger size (1260 atoms) slider.

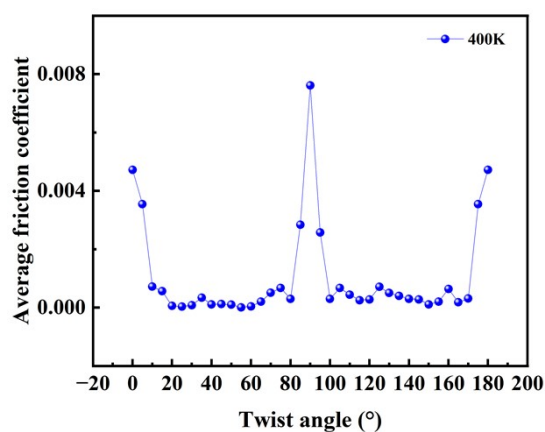

**Fig.S8** The averaged friction coefficients along 135° sliding direction at the interface of the relatively rotated bilayer penta-BN<sub>2</sub> with twist angles of 0° ~ 180° at 400K.
